# Supplementary material for: Te-template approach to fabricating ternary TeCuPt alloy nanowires with enhanced catalytic performance towards oxygen reduction reaction and methanol oxidation reaction
Source: Royal Society of Chemistry journal article supplement (doi:10.1039/c4ta05811a), 2015-01-01
Supplement: c4ta05811a1.pdf [file c4ta05811a1.pdf]

## Electronic Supplementary Information (ESI)

### Te–template Approach to Fabricating Ternary TeCuPt Alloy Nanowires with Enhanced Catalytic Performance towards Oxygen Reduction Reaction and Methanol Oxidation Reaction

Haibo Li\*, Cancan Ren, Shuling Xu, Lei Wang, Qiaoli Yue, Rui Li, Yuanfu Zhang, Qingwang Xue, and Jifeng Liu\*

Department of Chemistry, Liaocheng University, Liaocheng 252059, PR China

\*Corresponding author. Tel/Fax: +86 635 8239001, E-mail address:

haiboli@mail.ustc.edu.cn (H.B. Li), Liujiifeng111@gmail.com (J. F. Liu)

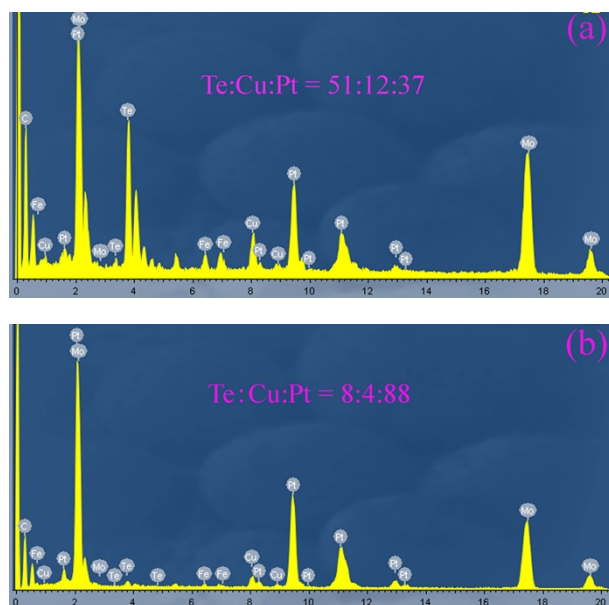

**Figure S1.** EDS of TeCuPt NWs (a) before and (b) after electrochemical dealloying.

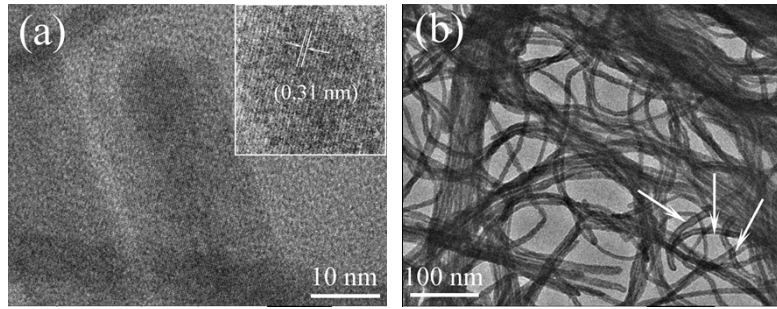

**Figure S2.** TEM image of TeCuPt NWs before (a) and after (b) KOH treatment. The inset of (a) shows the HRTEM image of Te core. The arrows in (b) indicate the presence of TeCuPt NTs.

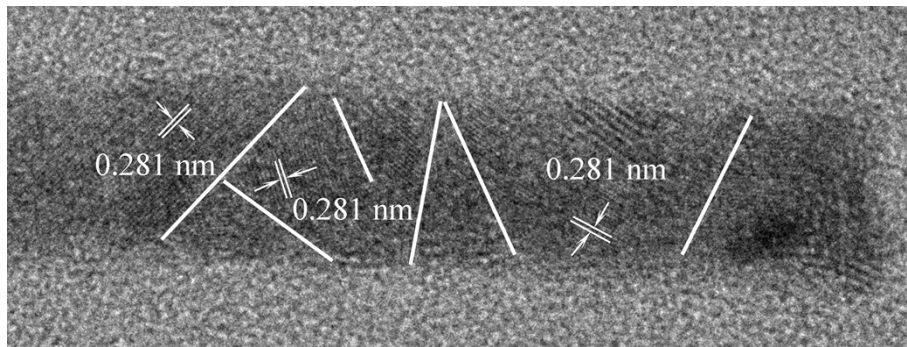

**Figure S3.** HRTEM image of a ternary TeCuPt NW after KOH treatment.

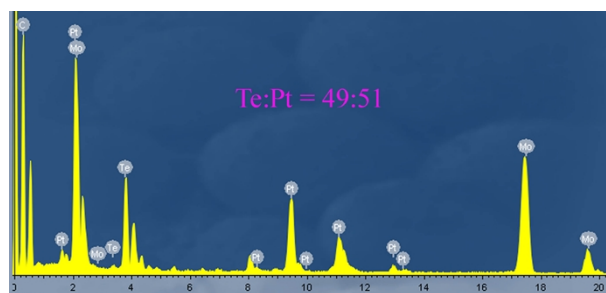

**Figure S4.** EDS of TePt NTs.

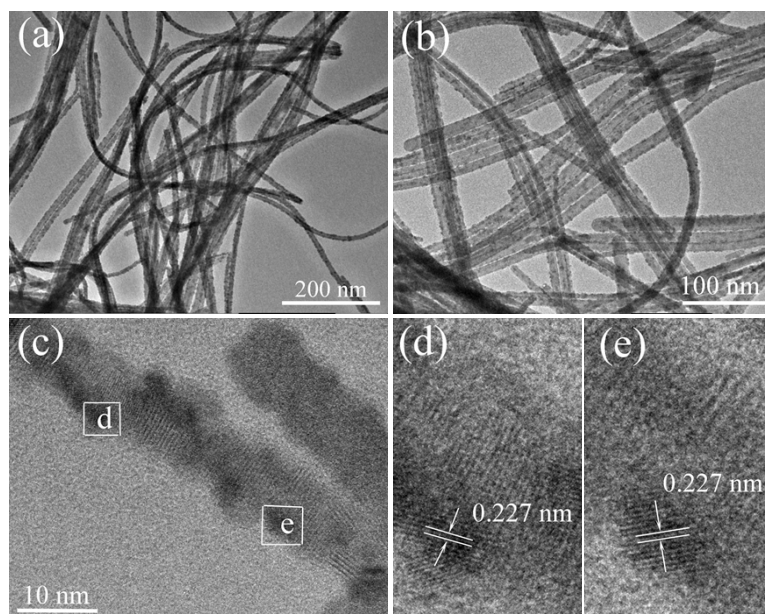

**Figure S5.** (a, b) TEM and (c-e) HRTEM images of ternary TeCuPt alloy obtained by fast injection of  $\text{CuSO}_4$  and  $\text{H}_2\text{PtCl}_6$ .

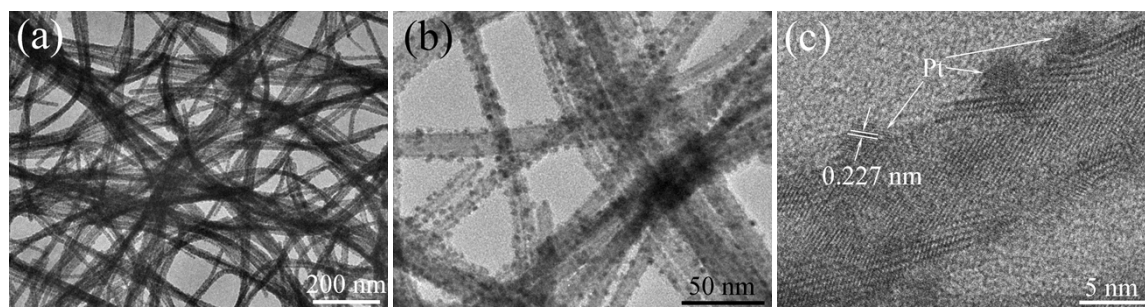

**Figure S6.** (a, b) TEM and (c) HRTEM images of binary TePt alloy obtained by fast injection of  $\text{H}_2\text{PtCl}_6$ .

In order to well explain how  $\text{Cu}^{2+}$  being reduced to Cu, we did following supplementary experiments. 0.5 g AA was firstly dissolved in 20 mL  $\text{H}_2\text{O}$  (Figure S7a), then 0.03g  $\text{CuSO}_4 \cdot 5\text{H}_2\text{O}$  was added. The color of AA solution immediately became yellow (Figure S7b), implying the reaction between  $\text{Cu}^{2+}$  and AA. When 0.03 g KI was added to the mixed solution of  $\text{Cu}^{2+}$  and AA, milk white CuI precipitate (Figure S7c and Figure S8) immediately formed when  $\text{Cu}^+$  contacted  $\text{I}^-$  for its low  $K_{\text{sp}}$

( $K_{sp_{CuI}} = 1.1 \times 10^{-12}$ ), and it well proved the formation of  $Cu^+$  in the presence of AA. Combined with the XPS results, we could conclude that the  $Cu^{2+}$  was firstly reduced to  $Cu^+$  by AA, then being further reduced to Cu by Te NWs.

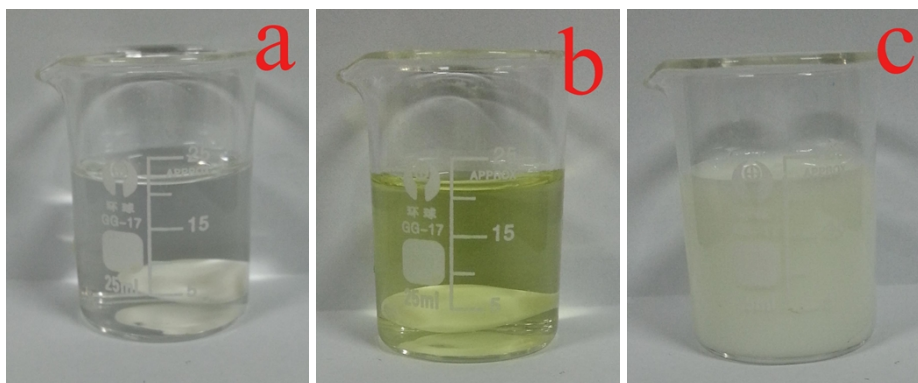

**Figure S7.** (a) AA solution containing 0.5 g AA; (b) 0.03g  $CuSO_4 \cdot 5H_2O$  was added to solution (a); (c) 0.03 g KI was added to solution (b).

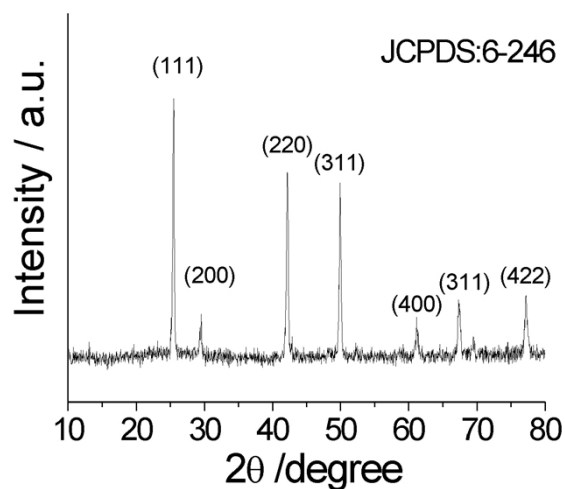

**Figure S8.** XRD pattern of white precipitates.

Figure S9a shows the XPS of Cu 2p CL region for TeCuPt NWs. It can be found that the Cu 2p spectrum exhibited two peaks at 932.7 ( $Cu2p_{3/2}$ ) and 952.4 ( $Cu2p_{1/2}$ ) eV, which was consistent with the previously reported Cu(0) 2p binding energy in Pt-Cu alloys (*ACS Appl. Mater. Interfaces* 2014, 6, 7301; *Chem. Commun.*, 2010, 46, 8989). Besides, the peak at 942 ( $Cu2p_{3/2}$  sat) eV suggested the presence of  $Cu^{2+}$ ,

which maybe came from the oxidation of surface Cu or adsorbent  $\text{Cu}^{2+}$ . The signals for Cu L3VV Auger spectrum (Figure S9b) were poor, and a low peak at  $\sim 918.9$  eV was observed, which was close to the reported kinetic energy (918.5 eV) for Cu(0) in literature (*Surf. Sci. Spectra*, 1994, 3, 202).

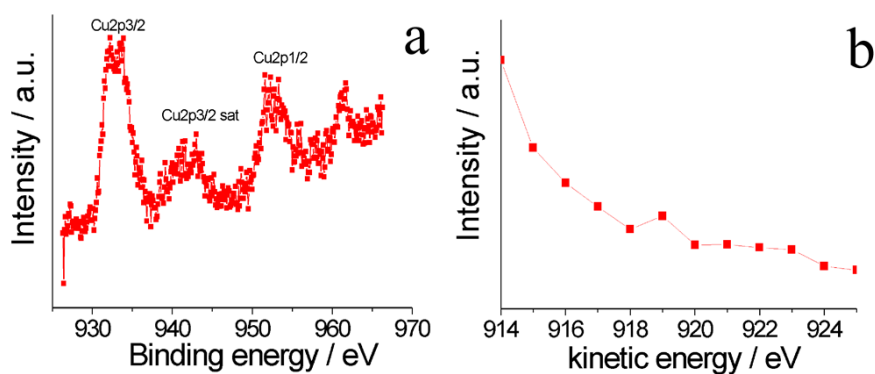

**Figure S9.** (a) XPS of Cu 2p CL region and (b) Cu L3VV Auger spectrum for TeCuPt NWs.

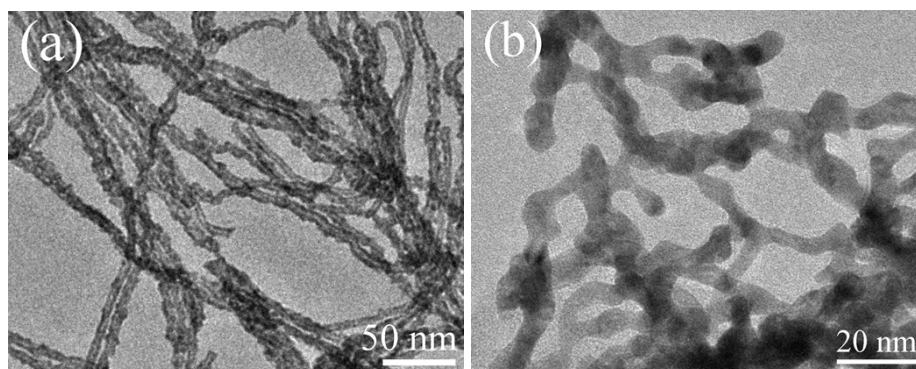

**Figure S10.** TEM images of TePt NTs (c) before and (b) after CV dealloying process.
